# Supplementary material for: Overall water splitting by graphdiyne-exfoliated and -sandwiched layered double-hydroxide nanosheet arrays
Source: PubMed Central journal article supplement (PMC6294247; doi:10.1038/s41467-018-07790-x), 2018-12-14
Supplement: 41467_2018_7790_MOESM3_ESM.pdf [file 41467_2018_7790_MOESM3_ESM.pdf]

## **Description of Additional Supplementary Files**

File Name: Supplementary Movie 1

Description: the overall water splitting process driven by a single-cell AA battery with a nominal voltage of 1.5 V. taken from a distance.

File Name: Supplementary Movie 2

Description: the overall water splitting process driven by a single-cell AA battery with a nominal voltage of 1.5 V. taken at a close range.
